# Supplementary material
Source: PubMed Central journal article supplement (PMC6795351)
Supplement: AET2-3-353-s001.pdf [file AET2-3-353-s001.pdf]

## Data Supplement S1. Supplemental material.

### Appendix S1 -- Search terms used in the literature search

#### 1) Surgeons

"Mentor\*" [tiab] OR "Coach\*" [tiab] OR "Professional development" [tiab] OR "Continuing education" [tiab] OR "Leader\* coaching" [tiab] OR "Peer coach\*" [tiab] OR "Teach\* skills" [tiab] OR "faculty development" [tiab] OR "One-to-one coach\*" [tiab] OR "Leader\* skill development" [tiab] OR "continuing professional development" [tiab] OR "reciprocal peer coach\*" [tiab] OR "Staff Develop\*" [tiab] OR "Career success" [tiab] OR "facilitation" [tiab] OR "personal development" [tiab] AND "Surgeons" [tiab]

#### 2) Physicians

"Mentor\*" [tiab] OR "Coach\*" [tiab] OR "Professional development" [tiab] OR "Continuing education" [tiab] OR "Leader\* coaching" [tiab] OR "Peer coach\*" [tiab] OR "Teach\* skills" [tiab] OR "faculty development" [tiab] OR "One-to-one coach\*" [tiab] OR "Leader\* skill development" [tiab] OR "continuing professional development" [tiab] OR "reciprocal peer coach\*" [tiab] OR "Staff Develop\*" [tiab] OR "Career success" [tiab] OR "facilitation" [tiab] OR "personal development" [tiab] AND "Physicians" [tiab]

1 **Appendix S2 -- Data extraction elements for each article included in the scoping review**

2

3 Title of paper:

4

5 Does this paper meet inclusion criteria (chose one):

6 • Yes it is on Coaching

7 • Yes it is on Mentorship

8 • Yes it is on both

9 • Yes it is on some variant of the above

10 • Maybe (not completely sure)

11 • No

12

13 If you answered maybe to the above question, please identify why

14

15 Is this about physicians/surgeons or physicians/surgeons-in-training (residents, house officers,  
16 etc..)?

17 • Yes

18 • No

19

20 Was this paper ONLY on medical students (exclusion)

21 • Yes

22 • No

23

24 Countries/country of origin

25

26 What type of paper was this?

- 27 • Commentary/Editorial/Letter to Editor/Perspectives/Narrative Review
- 28 • Descriptive Study (including program evaluations about new initiatives with minimal
- 29 supporting data)
- 30 • Justification study (i.e. this is better than that; Observation study of small initiative, etc..)
- 31 • Clarification study (why does this work
- 32 • Knowledge Synthesis (e.g. Systematic Review, Meta-analysis)

33

34 Population to which the intervention was applied (choose all that apply)

- 35 • Med students
- 36 • Residents
- 37 • Attending faculty

38

39 How many individuals were subject to the intervention?

40

41 Per the AUTHORS, what was the reason why the topic was studied, the innovation

42 undertaken/created, or paper written.

43

44 Specialty and setting in which the intervention was applied

45

46 What was the AUTHOR's description of the intervention?

47

48 What other interventions were applied other than coaching or mentorship?

49

50 QUANTITATIVE: Outcome measures of the intervention, as stated by the author(s):

51

52 QUANTITATIVE: Results of the study (as per outcome measures).

53

54 QUALITATIVE: What other questions did they seek to answer with qualitative methods?

55

56 QUALITATIVE: What findings did their qualitative work yield?

57

58 What type of change were they looking to make? (check all that apply)

- 59 • Looking to improve knowledge
- 60 • Cognitive skill (diagnosis, discerning, identification, etc)
- 61 • Manual skill (procedure)
- 62 • Emotional skill (self-perception, emotional intelligence, conflict resolution, reactivity, etc)
- 63 • Attitudinal Change

64

65 Tell us more about the change: What behaviours did the AUTHORS try to change in this  
66 population?

67

68 Level of implementation

- 69 • Local - small group (part of a department)
- 70 • Local - large group/whole department or program (>75% of department/program)
- 71 • Entire hospital
- 72 • Regional (less than a province or state)
- 73 • Provincial or Statewide
- 74 • National
- 75 • International

76

77 Kirkpatrick level outcome of the article/intervention

- 78 • 1

79 • 2

80 • 3

81 • 4

82 • N/A

83

84 Results of the interventional package

85

86 Identified cost of the intervention or time spent delivering the content

87

88

## Appendix S3 – A complete listing of papers extracted for the Scoping Review

(Mackenzie et al. 2019)

1. Ackroyd R. Mentoring for new consultants. *J R Coll Physicians Edinburgh*. 2015;45:143-147.
2. Ahmed K, Patel S, Aydin A, et al. European Association of Urology Section of Urolithiasis ( EULIS ) Consensus Statement on Simulation , Training , and Assessment in Urolithiasis. *Eur Urol Focus*. 2018;4(4):614-620. doi:10.1016/j.euf.2017.03.006.
3. Al-imari L, Yang J, Pimlott N, \. Peer-support writing group in a community family medicine teaching unit. *Can Fam Physician*. 2016;62:724-730.
4. Alisic S, Boet S, Sutherland S, Bould MD. A qualitative study exploring mentorship in anesthesiology: perspectives from both sides of the relationship. *Can J Anesth Can d'anesthésie*. 2016:851-861. doi:10.1007/s12630-016-0649-3.
5. Beasley HL, Ghouseini HN, Wiegmann DA, Brys NA, Quamme SRP, Greenberg CC. Strategies for Building Peer Surgical Coaching Relationships. *JAMA Surg*. 2017;152(4):1-9. doi:10.1001/jamasurg.2016.5540.
6. Bellande BJ, Winicur ZM, Cox KM. Urgently Needed : A Safe Place for Self-Assessment on the Path to Maintaining Competence and Improving Performance. *Acad Med*. 2010;85(1):16-18.
7. Berian JR, Thomas JM, Minami CA, et al. Evaluation of a novel mentor program to improve surgical care for US hospitals. 2017;29(February):234-242. doi:10.1093/intqhc/mzx005.
8. Britt RC, Hildreth AN, Acker SN, et al. Speed Mentoring : An Innovative Method to Meet the Needs of the Young Surgeon. *J Surg Educ*. 2017;74(6):1007-1011. doi:10.1016/j.jsurg.2017.05.004.
9. Buddeberg-fischer B, Herta K. Formal mentoring programmes for medical students and doctors – a review of the Medline literature. 2006;28(3):248-257. doi:10.1080/01421590500313043.
10. Buddeberg-fischer B, Stamm M, Buddeberg C. Academic career in medicine – requirements and conditions for successful advancement in Switzerland. 2009;14:1-14. doi:10.1186/1472-6963-9-70.
11. Bussey-jones J, Bernstein L, Higgins S, et al. Repaving the Road to Academic Success : The IMERGE Approach to Peer Mentoring. *Acad Med*. 2006;81(7):674-679.
12. Campbell KM, Williams RL. Underrepresented Minority Faculty in Academic Medicine: A Systematic Review of URM Faculty Development.
13. Carey EC, Weissman DE. Understanding and Finding Mentorship : *J Palliat Med*. 2010;13(11):1373-1379. doi:10.1089/jpm.2010.0091.
14. Challacombe B, Kandaswamy R, Dasgupta P, Mamode N. Telementoring Facilitates Independent Hand-Assisted Laparoscopic Living Donor Nephrectomy. 2005:613-616. doi:10.1016/j.transproceed.2005.01.065.
15. Cochran A, Elder WB, Neumayer LA. Characteristics of Effective Mentorship for Academic Surgeons A Grounded Theory Model. 2017;XX(Xx). doi:10.1097/SLA.0000000000002487.
16. Cohen MS, Jacobs JP, Quintessenza JA, et al. Original Article Mentorship, learning curves, and balance. 2007;17:164-174. doi:10.1017/S1047951107001266.

17. Cuesta MA, Wielen N Van Der, Straatman J, Peet DL Van Der. Mastering minimally invasive esophagectomy requires a mentor ; experience of a personal mentorship. *Ann Med Surg.* 2017;13:38-41. doi:10.1016/j.amsu.2016.12.050.
18. Daley SP, Palermo A, Nivet M, et al. Successful Programs in Minority Faculty Development : Ingredients of Success Address Correspondence to : 2008;(6):533-551. doi:10.1002/MSJ.
19. Deiorio NM, Carney PA, Kahl LE, Bonura EM, Juve AM. Coaching: a new model for academic and career achievement. 2016;21(33480):1-4.
20. DeLong MR, Hughes DB, Tandon VJ, Choi BD, Zenn MiR. Factors influencing fellowship selection, career trajectory, and academic productivity among plastic surgeons. *Plast Reconstr Surg.* 2014;133(3):730-736. doi:10.1097/01.prs.0000438043.98762.51.
21. Donovan A. Views of Radiology Program Directors on the Role of Mentorship in the Training of Radiology Residents. *Heal Care Policy Qual.* 2010;194(March):704-708. doi:10.2214/AJR.09.3403.
22. Ehrich LC, Hansford B, Tennent L. Medical Contexts and Mentoring. In: *British Educational Research Association Annual Conference.* Edinburgh; 2003.
23. Entezami P, Franzblau LE, Chung KC. Mentorship in surgical training : a systematic review. 2012:30-36. doi:10.1007/s11552-011-9379-8.
24. Farhat W, Houry A, Bagli D, Mclorie G. Mentored retroperitoneal laparoscopic renal surgery in children : a safe. 2003. doi:10.1046/j.1464-410X.2003.04428.x.
25. Farrell SE, Digioia NM, Broderick KB, Coates WC. Mentoring for Clinician-Educators. *Acad Emerg Med.* 2004;11(12):1346-1350. doi:10.1197/j.aem.2004.07.009.
26. Feng L, Song J, Zhang D, Tian Y. Evaluation of the learning curve for transurethral plasmakinetic enucleation and resection of prostate using a mentor-based approach. 2017;43(2):245-255. doi:10.1590/S1677-5538.IBJU.2016.0237.
27. Ferris FD, Moore SY, Callaway M V, Foley KM. Leadership Development Initiative : Growing Global Leaders . Advancing Palliative Care. *J Pain Symptom Manage.* 2018;55(2):S146-S156. doi:10.1016/j.jpainsymman.2017.05.011.
28. Files JA, Blair JE, Mayer AP, Ko MG. Facilitated Peer Mentorship : A Pilot Program for Academic Advancement of Female Medical Faculty. 2008;17(6). doi:10.1089/jwh.2007.0647.
29. Flint JH, Jahangir AA, Browner BD, Mehta S. The Value of Mentorship in Orthopedic Surgery Resident Education: The Residents' Perspective. *J Bone Jt Surg.* 2009;91:1017-1022. doi:10.2106/JBJS.H.00934.
30. Flores G, Mendoza FS, Fuentes-afflick E, et al. Hot topics, urgent priorities, and ensuring success for racial / ethnic minority young investigators in academic pediatrics. *Int J Equity Health.* 2017;(2016):1-10. doi:10.1186/s12939-016-0494-6.
31. Fornari A, Torte LM, Lay M, et al. A Mixed-Methods Approach to Humanistic Interprofessional Faculty Development. 2018;38(1):66-72. doi:10.1097/CEH.000000000000184.
32. Galicia AR, Klima RR, Date ES. MENTORSHIP IN PHYSICAL MEDICINE AND REHABILITATION. *Am J Phys Med Rehabil.* 2018;76(August 1997):268-275.
33. Geist LJ, Cohen MB. Mentoring the Mentor: Executive Coaching for Clinical Departmental Executive Officers. *Acad Med.* 2010;85(1):23-25.
34. Greenberg CC, Ghouseini HN, Pavuluri Quamme SR, et al. A Statewide Surgical Coaching Program Provides Opportunity for Continuous Professional Development. *Ann Surg.* 2018;267(5):868-873. doi:10.1097/SLA.0000000000002341.

35. Gupta S, Moosa D, Macpherson A, Allen C, Tamari IE. Effects of a 12-month multi-faceted mentoring intervention on knowledge , quality , and usage of spirometry in primary care : a before-and-after study. *BMC Pulm Med*. 2016:1-9. doi:10.1186/s12890-016-0220-6.
36. Healy NA, Glynn RW, Malone C, Cantillon P, Kerin MJ. Surgical Mentors and Role Models: Prevalence, Importance and Associated Traits. *JSURG*. 2012;69(5):633-637. doi:10.1016/j.jsurg.2012.04.015.
37. Healy NA, B M, Cantillon P, et al. Role models and mentors in surgery. *AJS*. 2012;204(2):256-261. doi:10.1016/j.amjsurg.2011.09.031.
38. Hoover EL. Mentoring Surgeons in Private and Academic Practice. *Arch Surg*. 2005;140(June):598-608.
39. Hu Y, Peyre SE, Arriaga AF, et al. Postgame Analysis : Using Video-Based Coaching for Continuous Professional Development. 2012:115-124. doi:10.1016/j.jamcollsurg.2011.10.009.
40. Hunter JJ, Rockman P, Gingrich N, Silveira J, Salach L. A Novel Network for Mentoring Family Physicians on Mental Health Issues Using E-mail. *Acad Psychiatry*. 2008;32(December):510-514.
41. Hussein AA, Sha SB, Sharif M, et al. Technical mentorship during robot-assisted surgery : a cognitive analysis. 2016:429-436. doi:10.1111/bju.13445.
42. Ikbal MFBM, Jinting W, Wahab MT, Kanessvaran R, Krishna LKR. Mentoring in Palliative Medicine : Guiding Program Design through Thematic Analysis of Mentoring in Internal Medicine between 2000 and. *J Palliat Care Med*. 2017;7(5):1-10. doi:10.4172/2165-7386.1000318.
43. Iyasere CA, Baggett M, Romano J, Jena A, Mills G, Hunt DP. Beyond Continuing Medical Education : Clinical Coaching as a Tool for Ongoing Professional Development. 2016;91(12):1647-1650. doi:10.1097/ACM.0000000000001131.
44. Jaffer U, Vaughan-Huxley E, Standfield N, John NW. Medical mentoring via the evolving world wide web. *Journal of surgical education*. 2013 Jan 1;70(1):121-8.
45. Jenkins LS, Gunst C, Blitz J, Coetzee JF. What keeps health professionals working in rural district hospitals in South Africa ? *Africal J Prim Heal Care Fam Med*. 2015;7(1):805. doi:10.4102/phcfm.v7i1.805.
46. Jingling
47. Johnson JC, Williams B, Jayadevappa R. Mentoring Program for Minority Faculty at the University of Pennsylvania School of Medicine. *Acad Med*. 1999;74(376-379).
48. Kaderli RM, Klasen JM, Businger AP. Mentoring in general surgery in Switzerland. *Med Educ Online*. 2015;20:27528.
49. Kaderli R, Muff B, Stefenelli U, Businger A. Female surgeons ' mentoring experiences and success in an academic career in Switzerland. 2011;(July):1-8. doi:10.4414/smw.2011.13233.
50. Kang H, Yip B, Chau W, et al. Continuing professional development in HIV chronic disease management for primary care providers. *Med Teach*. 2015;37:714-717. doi:10.3109/0142159X.2014.970623.
51. Kashiwagi DT, Varkey P, Cook DA. Mentoring Programs for Physicians in Academic Medicine : A Systematic Review. 2013;88(7):1029-1037. doi:10.1097/ACM.0b013e318294f368.
52. Kaye AD. Clinical performance feedback and quality improvement opportunities for perioperative physicians. 2014:115-123.
53. Keane M, Long J. Mentoring in post-graduate medical education and specialist training Mentoring in post - graduate medical education and specialist training. 2018.



54. King A, Sharma-crawford I, Shaaban AF, et al. The pediatric surgeon's road to research independence: utility of mentor-based National Institutes of Health grants. *J Surg Res*. 2013;184(1):66-70. doi:10.1016/j.jss.2013.03.050.
55. Lee BR, Moore R. International telementoring: a feasible method of instruction. 2000:296-298.
56. Lefebvre GG, Shore EM. Avoiding complications by a hands-on mentor programme. *Best Pract Res Clin Obstet Gynaecol*. 2016;35:3-12. doi:10.1016/j.bpobgyn.2015.11.003.
57. Leier C V, Auseon AJ, Binkley PF. Selecting a Mentor: A Guide for Residents, Fellows, and. *AJM*. 2011;124(10):893-895. doi:10.1016/j.amjmed.2011.04.031.
58. Linney B. Coach Your Physicians to Care. *Physician Exec*. 2001:36-39.
59. Love JN, Coates WC, Santen SA, Hobgood CD, Mavis BE, Farrell SE. No Title. doi:10.1111/j.1553-2712.2009.00591.x.
60. MacCarthy D, Kallstrom L, Kadlec H, Hollander M. Improving primary care in British Columbia , Canada : evaluation of a peer-to-peer continuing education program for family physicians. *BMC Med Educ*. 2012;12(1):1. doi:10.1186/1472-6920-12-110.
61. Marguet CG, Young MD, Esperance JOL, et al. Hand assisted laparoscopic training for postgraduate urologists: the role of mentoring. 2004;172(July):286-289. doi:10.1097/01.ju.0000132158.84026.0e.
62. Martinelli SM, McGraw KA, Kalbaugh CA, Vance S, Viera AJ, Zvara DA, Mayer DC. A Novel Core Competencies-Based Academic Medicine Curriculum: Description and Preliminary Results. *The journal of education in perioperative medicine*. 2014 Jul;16(10).
63. Maudsley RF. Assessment of International Medical Graduates and Their Integration into Family Practice : The Clinician Assessment for Practice Program. 2008;83(3):309-315.
64. McCord JH, McDonald R, Ph D, et al. ASSOCIATION FOR ACADEMIC SURGERY , 2008 Surgical Career Choices : The Vital Impact of Mentoring. *J Surg Res*. 2009;155(1):136-141. doi:10.1016/j.jss.2008.06.048.
65. McCormick TJ, Miller EC, Chen R, Naik VN. Acquiring and maintaining point-of-care ultrasound ( POCUS ) competence for anesthesiologists ´ tences en e ´ chographie au L ´ acquisition et le maintien des compe ´ siologistes chevet ( POCUS ) pour les aneste. *Can J Anesth Can d'anesthésie*. 2018;65(4):427-436. doi:10.1007/s12630-018-1049-7.
66. McKenna AM, Straus SE. Charting a Professional Course : A Review of Mentorship in Medicine. *JACR*. 2018;8(2):109-112. doi:10.1016/j.jacr.2010.07.005.
67. Mcleod PJ, Steinert Y. Peer coaching as an approach to faculty development. 2009:1043-1044. doi:10.3109/01421590903188729.
68. Meagher E, Taylor L, Ed M, Probsfi J, Fleming M. Evaluating Research Mentors Working in the Area of Clinical Translational Science : A Review of the Literature. *Can Thoracics Soc J*. 2011;4(5):353-358. doi:10.1111/j.1752-8062.2011.00317.x.
69. Mellon A, Murdoch-eaton D. Supervisor or mentor : is there a difference ? Implications for paediatric practice. 2015:873-878. doi:10.1136/archdischild-2014-306834.
70. Memon B, Ashraf AEM. Mentoring and surgical training: a time for reflection! 2010:749-754. doi:10.1007/s10459-009-9157-3.
71. Merriweather LR, Morgan AJ. Two Cultures Collide: Bridging the Generational Gap in a Non-traditional Mentorship. *Qual Rep*. 2013;18:1-16.
72. Miller A, Archer J. Impact of workplace based assessment on doctors ´ education and performance: a systematic review. 2018:1-12. doi:10.1136/bmj.c5064.

73. Min H, Morales R, Orgill D. Education Systematic review of coaching to enhance surgeons ' operative performance. *Surgery*. 158(5):1168-1191. doi:10.1016/j.surg.2015.03.007.
74. Moorthy LN, Muscal E, Riebschleger M, et al. Efficacy of an Interinstitutional Mentoring Program Within Pediatric Rheumatology. 2016;68(5):645-651. doi:10.1002/acr.22732.
75. Moran WP, Zapka J, Iverson PJ, et al. Aging Q 3 : An Initiative to Improve Internal Medicine Residents' Geriatrics Knowledge, Skills, and Clinical Performance. 2012;87(5):635-642. doi:10.1097/ACM.0b013e31824d4a10.
76. Mutabdzic D, Mylopoulos M, Murnaghan ML, et al. Coaching Surgeons. 2015;262(2):213-216. doi:10.1097/SLA.0000000000001247.
77. Nalliah S. Mentoring in the clinical setting : Process , issues and challenges. 2012;6(1):4-10.
78. Ogden PE, Edwards J, Howell M, Via RM, Song J. The Effect of Two Different Faculty Development Interventions on Third-year Clerkship Performance Evaluations. 40(5).
79. Orandi BJ, Blackburn S, Henke PK. Surgical mentors ' and mentees ' productivity from 1993 to 2006. *AJS*. 2011;201(2):260-265. doi:10.1016/j.amjsurg.2010.01.026.
80. Orlander JD, Gupta M, Fincke BG, Manning ME, Hershman W. Co-teaching : a faculty development strategy. 2000:257-265.
81. Palamara K, Kauffman C, Stone VE. Promoting Success : A Professional Development Coaching Program for Interns in Medicine. 2015;(December):630-637.
82. Patel MB, Laudanski K, Pandharipande PP. An International Career Development Survey of Critical Care Practitioners. *Crit Care Med*. 2015;42(4):e300-e303. doi:10.1097/CCM.000000000000137.An.
83. Patel VM, Warren O, Ahmed K, et al. How can we build mentorship in surgeons of the future? *ANZ J Surg*. 2011;81:418-424. doi:10.1111/j.1445-2197.2011.05779.x.
84. Pellegrini VD. Mentoring During Residency Education. 2006;(449):143-148. doi:10.1097/01.blo.0000224026.85732.fb.
85. Peyre SE, Frankl SE, Thorndike M, Breen EM. Observation of Clinical Teaching : Interest in a Faculty Development Program for Surgeons. *JSURG*. 2011;68(5):372-376. doi:10.1016/j.jsurg.2011.04.001.
86. Phitayakorn R, Petrusa E, Hodin RA. ScienceDirect Association for Academic Surgery Development and initial results of a mandatory department of surgery faculty mentoring pilot program. *J Surg Res*. 2016;205(1):234-237. doi:10.1016/j.jss.2016.06.048.
87. Ragsdale JR, Vaughn LM, Klein M. Characterizing the Adequacy , Effectiveness , and Barriers Related to Research Mentorship Among Junior Pediatric Hospitalists and General Pediatricians at a Large Academic Institution. *Hosp Pediatr*. 2013;4:93-98. doi:10.1542/hpeds.2013-0075.
88. Rahal A, Charron M. Video-Assisted Septoplasty: The Future in Teaching Septal Surgery—A Technical Note. 2017:4-6. doi:10.1177/0194599816686946.
89. Reisman AB, Gross CP. Gender Differences in the Ability to Identify a Mentor at Morning Report : A Multi-Institutional Survey. 2002:236-239.
90. Rodriguez JR, Campbell KM, Fogarty JP, Williams RL. Underrepresented Minority Faculty in Academic Medicine : A Systematic Review of URM Faculty Development. *Fam Med*. 2014;46(2):100-104.
91. Rosser JC, Wood M, Payne JH, et al. Surgical Endoscopy A practical option in surgical training. 1997:852-855.

92. Sachdeva AK, Blair PG, Lupi LK. Education and Training to Address Specific Needs During the Career Progression of Surgeons. *Surg Clin North Am*. 2018;96(2016):115-128. doi:10.1016/j.suc.2015.09.008.
93. Saperstein AK, Viera AJ, Firnhaber GC. Mentorship and job satisfaction among Navy family physicians. *Military medicine*. 2012 Aug 1;177(8):883-8.
94. Sambunjak D, Straus SE, Marusic A. Mentoring in Academic Medicine. 2010;296(9):1103-1115. doi:10.1001/jama.296.9.1103.
95. Sargeant J, Bruce D, Campbell CM. Practicing Physicians ' Needs for Assessment and Feedback. *J Contin Educ Health Prof*. 2013;33(1). doi:10.1002/chp.
96. Sargeant J, Silver I, Holmboe E, et al. Facilitated Reflective Performance Feedback: Developing an Evidence- and Theory-Based Model That Builds Relationship, Explores Reactions and Content, and Coaches for Performance Change (R2C2) Joan. *Acad Med*. 2015;90(12):1698-1706. doi:10.1097/acm.0000000000000809.
97. Sarkiss CA, Philemond S, Lee J, et al. Neurosurgical Skills Assessment: Measuring Technical Proficiency in Neurosurgery Residents Through Intraoperative Video Evaluations. *World Neurosurg*. 2016;89:1-8. doi:10.1016/j.wneu.2015.12.052.
98. Schlachta CM, Kent SA, Lefebvre KL, McCune ML, Jayaraman S. A model for longitudinal mentoring and telementoring of laparoscopic colon surgery. *Surgical endoscopy*. 2009 Jul 1;23(7):1634-8.
99. Sekerka LE. Peer Coaching as a Technique to Foster Professional Development in Clinical Ambulatory Settings. *J Contin Educ Health Prof*. 2003;23:30-37.
100. Shortell CK, Cook C. Importance of Gender-Specific Role Models in Vascular Surgery. 2008;16(3):123-129. doi:10.2310/6670.2008.00024.
101. Silver I, Campbell C, Marlow B, Sargeant J. Self-assessment and continuing professional development: the Canadian perspective. *Journal of Continuing Education in the Health Professions*. 2008 Dec;28(1):25-31.
102. Sinclair P, Fitzgerald JEF, Hornby ST, Shalhoub J. Mentorship in Surgical Training : Current Status and A Needs Assessment for Future Mentoring Programs in Surgery. 2015:303-313. doi:10.1007/s00268-014-2774-x.
103. Steinert Y, Basi M, Nugus P. How physicians teach in the clinical setting : The embedded roles of teaching and clinical care. *Med Teach*. 2017;0(0):1-7. doi:10.1080/0142159X.2017.1360473.
104. Steinert Y, Macdonald ME. Why physicians teach: giving back by paying it forward. 2015:773-782. doi:10.1111/medu.12782.
105. Stuart M, Wilson C. Mentoring in healthcare: A rehabilitation hospital's launch of an innovative program for emerging leaders. 2015. doi:10.1177/0840470414551896.
106. Takenoshita S, Nomura K, Ohde S, et al. Having a Mentor or a Doctoral Degree Is Helpful for Mid-Career Physicians to Publish Papers in Peer-Reviewed Journals. 2016:325-331. doi:10.1620/tjem.239.325.Correspondence.
107. Tietjen P, Griner PF. Mentoring of Physicians at a Community-Based Health System : Preliminary Findings. 2013:642-643. doi:10.1002/jhm.2094.
108. Sebahang H, Trudeau P, Dougall A, Hegge S, McKinley C, Anvari M. Telementoring: an important enabling tool for the community surgeon. *Surgical innovation*. 2005 Dec;12(4):327-31.
109. Tietjen P, Griner PF. Mentoring of physicians at a community-based health system: Preliminary findings. *Journal of hospital medicine*. 2013 Nov 1;8(11):642-3.
110. Toledo-pereyra LH. Mentoring Surgeons. 2009:77-81. doi:10.1080/08941930902747719.

111. Topps D, Evans RJ, Thistlethwaite JE, Tie RN, Ellaway RH. The One Minute Mentor : A Pilot Study Assessing Medical Students ' and Residents ' Professional Behaviours through Recordings of Clinical Preceptors ' Immediate Feedback. 2009;1-11.
112. Tsai JC, Lee PP, Chasteen S, Taylor RJ, Brennan MW, Schmidt GE. Resident Physician Mentoring Program in Ophthalmology. 2006;124:4-7.
113. van de Wiel M, Bossche P Van Den, Janssen S, Jossberger H. Exploring deliberate practice in medicine: how do physicians learn in the workplace? *Adv Heal Sci Educ*. 2011;16:81-95. doi:10.1007/s10459-010-9246-3.
114. van Schalkwyk GI, Katz RB, Resignato J, van Schalkwyk SC, Rohrbaugh RM. Effective Research Mentorship for Residents: Meeting the Needs of Early Career Physicians. *Academic Psychiatry*. 2017 Jun 1;41(3):326-32.
115. Wahab MT, Wu JT, Ikbal MF, Loo TW, Kanavaran R, Radha Krishna LK. Creating effective interprofessional mentoring relationships in palliative care-lessons from medicine, nursing, surgery and social work. *J Palliat Care Med*. 2016;6(6):290.
116. Wenghofer EF, Way D, Moxam RS, Wu H, Faulkner D, Klass DJ. Effectiveness of an Enhanced Peer Assessment Program : Introducing Education into Regulatory Assessment. 2006;26(3):199-208. doi:10.1002/chp.
117. Woods RA, Artz JD, Carrière B, et al. CAEP Academic Symposium Papers CAEP 2016 Academic Symposium on Education Scholarship : Training our Future Clinician Educators in Emergency Medicine. 2018;19:1-8. doi:10.1017/cem.2017.41.
118. Yamada S, Shimada M, Imura S, Morine Y. Effective stepwise training and procedure standardization for young surgeons to perform laparoscopic left hepatectomy. *Surg Endosc*. 2017;31(6):2623-2629. doi:10.1007/s00464-016-5273-3.
119. Yang SC, Vaporciyan AA, Mark RJ, et al. The Joint Council on Thoracic Surgery Education ( JCTSE ) " Educate the Educators " Faculty Development Course : Analysis of the First 5 Years. *Ann Thorac Surg*. 2016;102(6):2127-2132. doi:10.1016/j.athoracsur.2016.04.080.
120. Yardley S, Westerman M, Bartlett M, Walton JM, Smith J, Peile E. The do's, don't and don't knows of supporting transition to more independent practice. *Perspect Med Educ*. 2018;7:8-22. doi:10.1007/s40037-018-0403-3
121. Yelon SL, Ford JK, Anderson WA. Twelve tips for increasing transfer of training from faculty development programs. 2014:945-950. doi:10.3109/0142159X.2014.929098.
122. Yeung M, Nuth J, Stiell IG. EDUCATION • E NSEIGNEMENT Faculty Development Mentoring in emergency medicine : the art and the evidence. 2010;12(2):2010.
123. Yorozuya K, Kawase K, Chizuko SA. Mentorship as Experienced by Women Surgeons in Japan. *World J Surg*. 2016;40(1):38-44. doi:10.1007/s00268-015-3245-8.
124. Zahid A. Coaching Experts : Applications to Surgeons and Continuing Professional Development. *Surg Innov*. 2018;25(1):77-80. doi:10.1177/1553350617751450.
125. Zakrisson TL, Polk TM, Dixon R, et al. Paying it forward : Four-year analysis of the Eastern Association for the Surgery of Trauma Mentoring Program. 2017;83(1):165-169. doi:10.1097/TA.0000000000001493.
126. Zusan E, Vaughan A, Welling RE. Mentorship in a community-based residency program. *The American Surgeon*. 2006 Jul 1;72(7):563-4.
